# Supplementary material for: Sexual dimorphism of osteoclast reliance on mitochondrial oxidation of energy substrates in the mouse
Source: PubMed Central journal article supplement (PMC10807709; doi:10.1172/jci.insight.174293), 2023-12-22
Supplement: jciinsight-8-174293-s103.pdf [file jciinsight-8-174293-s103.pdf]

**Supplemental Table I. Nucleotide sequences of primers used in RT-qPCR**

| Gene     | Forward primer                | Reverse primer               |
|----------|-------------------------------|------------------------------|
| Acp5     | AAGCGCAAACGGTAGTAAGG          | CGTCTCTGCACAGATTGCAT         |
| Nfatc1   | GGTAACTCTGTCTTTCTAACCTTAAGCTC | GTGATGACCCCAGCATGCACCAGTCACA |
| c-fos    | CAAGCGGAGACAGATCAACTTG        | TTTCTTCTCTTTCAGCAGATTGG      |
| Ctsk     | AGGCAGCTAAATGCAGAGGGTACA      | AGCTTGCATCGATGGACACAGAGA     |
| Dcstamp  | ACAAACAGTTCCAAAGCTTGC         | TCCTTGGGTTCCCTTGCTTC         |
| Atp6v0d2 | GAAGCTGTCAACATTGCAGA          | TCACCGTGATCCTTGCAGAAT        |
| Cpt1a    | GGTCTTCTCGGGTCGAAAGC          | TCCTCCACCAGTCACTCAC          |

**Supplemental Table II. Relative mRNA levels of Cpt1 genes during osteoclast differentiation**

| Gene Name | Day 0-1  | Day 0-2  | Day 0-3  | Day 4-1 | Day 4-2 | Day 4-3 |
|-----------|----------|----------|----------|---------|---------|---------|
| Cpt1a     | 110.3279 | 104.8234 | 103.0636 | 69.8292 | 52.3812 | 63.9754 |
| Cpt1b     | 0.3882   | 0.3777   | 0.3329   | 0.4516  | 0.1421  | 0.2744  |
| Cpt1c     | 0.4003   | 0.4003   | 0.6634   | 2.1488  | 1.6245  | 1.6731  |

Shown are TPM by RNA-seq in three independent samples at day 0 or 4 of differentiation.

## Supplemental Figures

**Figure S1. Osteoclast differentiation from BMM in vitro.** (A) A schematic of bone marrow macrophages (BMM) preparation and osteoclast differentiation. (B-G) Expression of osteoclast marker genes assessed by RT-qPCR following different days of differentiation. (H) Most significantly affected pathways in osteoclasts (OC) vs BMM as detected by IPA analysis of RNA-seq data. Positive Z scores indicate increased expression in osteoclasts. (I, J) Heatmap of TCA (I) and ETC (J) genes based on RNA-seq of OC versus BMM. (K) Representative images for osteoclast differentiation in Seahorse plates. Purple staining indicates TRAP-positive preosteoclasts (day 2) or osteoclasts (day 4). \* $p < 0.05$ , \*\* $p < 0.01$ , against day 0, one-way ANOVA with Tukey's multiple comparisons test. Error bars: SD.

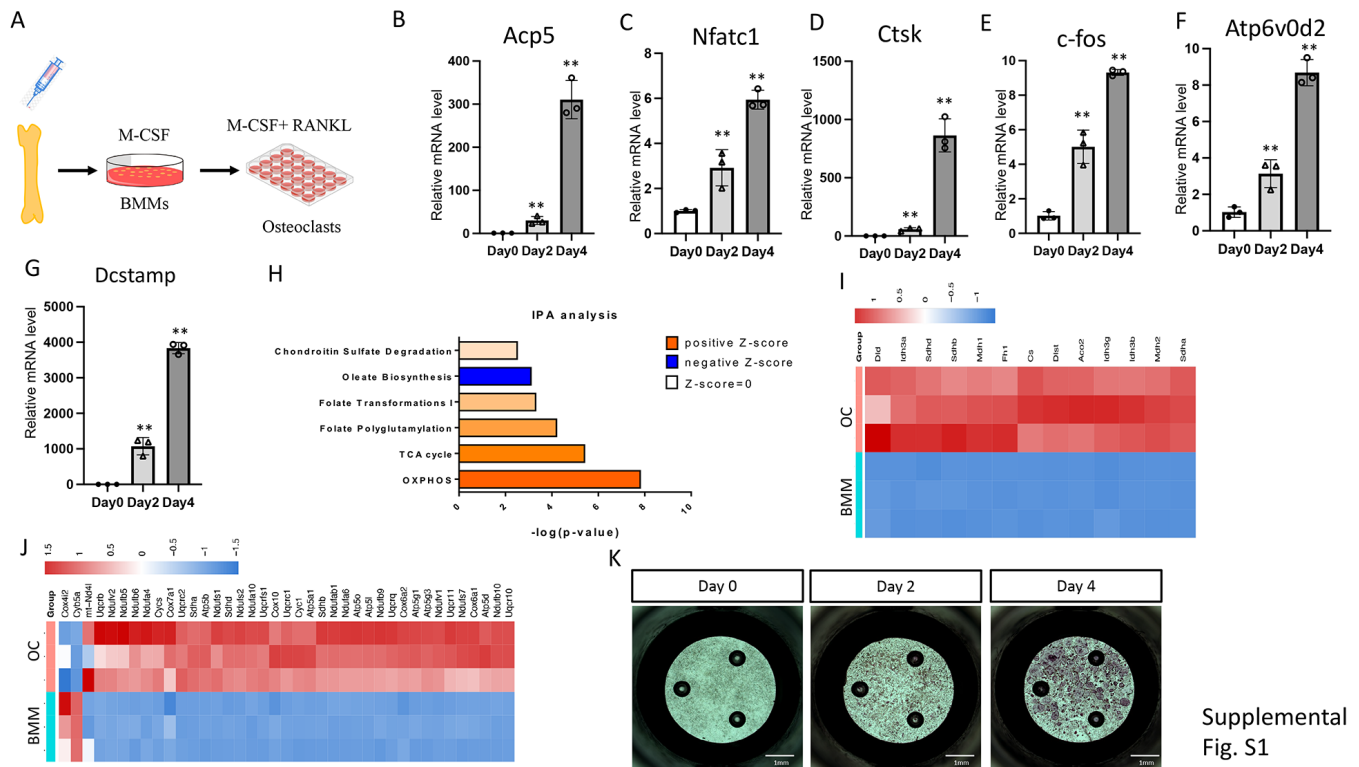

Supplemental Fig. S1

**Figure S2. Deletion of Cpt1a does not affect cortical bone in either sex. (A-E)**

Representative cortical bone images and cortical bone parameters of  $\mu$ CT in female mice. (F-I)

Quantification of cortical bone parameters by  $\mu$ CT in male mice. No statistical significance detected between mutant and wild-type mice by one-way ANOVA with Tukey's multiple comparisons test. Error bars: SD.

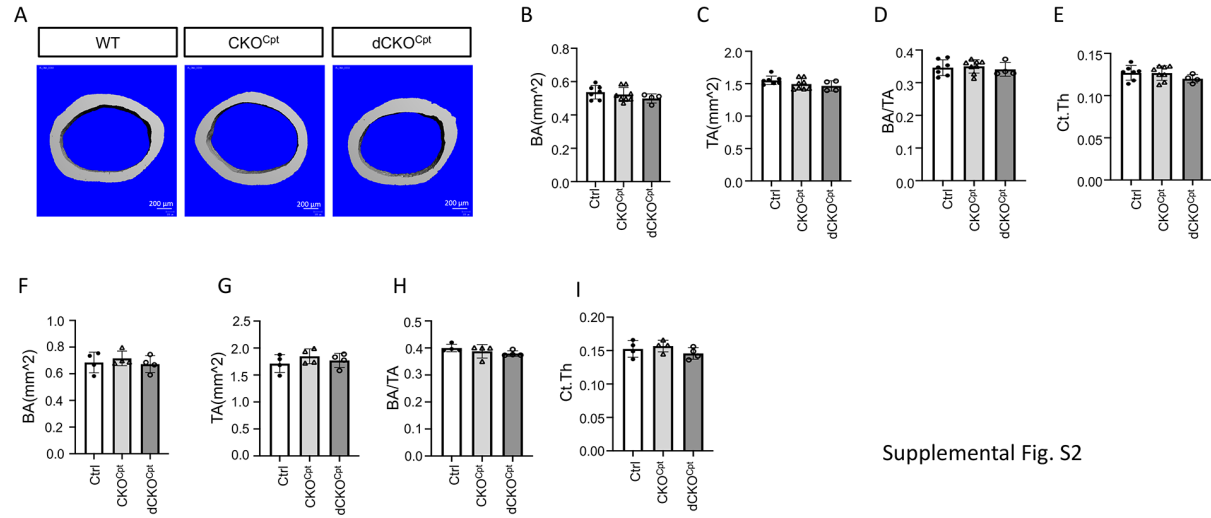

Supplemental Fig. S2
